# Supplementary material
Source: publisher figshare collection journal article supplement (https://frontiersin.figshare.com/ndownloader/files/34384814)
Supplement: Supplementary file 1 [file 34384814]

## Sheet: Sheet1
Table.S10 Bottleneck test under IAM and TPM model in S. schlegelii stocks
Populatiion	Models	Sign Test	Wilcoxon sign-rank test
FB2019	IAM	Hee = 5.47	P (one tail for H deficiency) = 0.97559
		Hd = 1	P (one tail for H excess) = 0.06445
		He = 8	P (two tails for H excess and deficiency) = 0.12891
		P = 0.07678
	TPM	Hee = 5.30	P (one tail for H deficiency) = 0.00195
		Hd = 8	P (one tail for H excess) = 0.99902
		He = 1	P (two tails for H excess and deficiency) = 0.00391
		P = 0.00470
RA2019	IAM	Hee = 5.45	P (one tail for H deficiency) = 5.8984
		Hd = 4	P (one tail for H excess) = 0.45508
		He = 5	P (two tails for H excess and deficiency) = 0.91016
		P = 0.50315
	TPM	Hee = 5.33	P (one tail for H deficiency) = 0.00488
		Hd = 8	P (one tail for H excess) = 0.99707
		He = 1	P (two tails for H excess and deficiency) = 0.00977
		P = 0.00435
NA2019	IAM	Hee = 5.48	P (one tail for H deficiency) = 0.89844
		Hd = 3	P (one tail for H excess) = 0.12500
		He = 6	P (two tails for H excess and deficiency) = 0.25000
		P = 0.50553
	TPM	Hee = 5.27	P (one tail for H deficiency) = 0.00195
		Hd = 8	P (one tail for H excess) = 0.99902
		He = 1	P (two tails for H excess and deficiency) = 0.00391
		P = 0.00490
WC2017	IAM	Hee = 5.39	P (one tail for H deficiency) = 0.58984
		Hd = 3	P (one tail for H excess) = 0.45508
		He = 6	P (two tails for H excess and deficiency) = 0.91016
		P = 0.47896
	TPM	Hee = 5.35	P (one tail for H deficiency) = 0.21289
		Hd = 5	P (one tail for H excess) = 0.82031
		He = 4	P (two tails for H excess and deficiency) = 0.42578
		P = 0.27706
WC2018	IAM	Hee = 5.44	P (one tail for H deficiency) = 0.78711
		Hd = 4	P (one tail for H excess) = 0.24805
		He = 5	P (two tails for H excess and deficiency) = 0.49609
		P = 0.50735
	TPM	Hee = 5.38	P (one tail for H deficiency) = 0.08203
		Hd = 5	P (one tail for H excess) = 0.93555
		He = 4	P (two tails for H excess and deficiency) = 0.16406
		P = 0.27142
Hee: heterozygosity excess expected; Hd: heterozygosity deficiency; He: heterozygosity excess; IAM: infinite allele model; TPM: two phase model.
Variance for TPM = 30.00%; Proportion of S.M.M. in TPM = 70.00%.
Significant values of probability are in bold.
